# Supplementary material for: Feedback control system simulator for the control of biological cells in microfluidic cross slots and integrated microfluidic systems
Source: Royal Society of Chemistry journal article supplement (doi:10.1039/c1lc20191c), 2011-01-01
Supplement: c1lc20191c.pdf [file c1lc20191c.pdf]

# Feedback control system simulator for the control of biological cells in microfluidic cross slots and integrated microfluidic systems

Michael Curtis, Gregory J. Sheard, and Andreas Fouras

## Electronic Supplementary Information – Explanatory Notes

### **Figure S1: Experimental Validation of Computational Fluid Dynamics simulations of the microfluidic cross slot.**

Velocity vectors, derived from particle image velocimetry (PIV) measurement of a saddle point flow in a scale model is shown overlaid with contours from CFD modelling of the same geometry. a) PIV and CFD results for a saddle point position centred in the channel; and b) shows the results for a saddle point position shifted 20 $\mu$ m from the centre point in the y direction.

### **Movies: Simulation Movies for cases I-III**

*Keywords:* fluid dynamics simulation, control systems, saddle point flows, biological cell trapping and manipulation, microfluidics

Simulation of a cell being captured in a saddle point flow. Active PID control is used to capture and maintain the position of a simulated red blood cell in the centre of the channel.

- Case I: Idealised control with no external sources of noise.
- Case II: Less ideal control system, with moderate observer resolution and fluid response time.
- Case III: Noisy control system, slow fluid response time, low observer resolution.

Detailed information about the three cases is available in the article text.
